# Supplementary material for: Damage to endothelial barriers and its contribution to long COVID
Source: Springer Nature journal article supplement (doi:10.1007/s10456-023-09878-5), 2023-04-27
Supplement: MOESM1 [file 10456_2023_9878_MOESM1_ESM.pdf]

## Supplementary Information

for

### Damage to endothelial barriers and its contribution to long COVID

#### in *Angiogenesis*

Xiaoming Wu, MD,<sup>1</sup> Mengqi Xiang, MD,<sup>1</sup> Haijiao Jing, MD,<sup>1</sup> Chengyue Wang, MD,<sup>1</sup> Valerie A Novakovic, MSc,<sup>2</sup> Jialan Shi, MD, PhD.<sup>1,2,3,\*</sup>

<sup>1</sup>Departments of Hematology, The First Hospital, Harbin Medical University, Harbin, China

<sup>2</sup>Department of Research, VA Boston Healthcare System, Harvard Medical School, Boston, MA USA

<sup>3</sup>Department of Medical Oncology, Dana-Farber Cancer Institute, Harvard Medical School, Boston, MA, USA

#### **\*Correspondence:**

Jialan Shi, MD, PhD

Departments of Research and Medical Oncology, VA Boston Healthcare System, Dana Farber Cancer Institute, Harvard Medical School, Boston, MA 02215 USA; Department of Hematology, The First Hospital, Harbin Medical University, Harbin 150001, China

Phone: 857-203-5914

Fax: 857-203-5592

ORCID ID: 0000-0001-5642-5436

E-mail: [jjalan\\_shi@dfci.harvard.edu](mailto:jjalan_shi@dfci.harvard.edu) and [shi73661@gmail.com](mailto:shi73661@gmail.com)

#### **Figure count: 1**

**Running head:** EC barrier damage in COVID-19

**Competing Interests:** None to declare for all the authors.

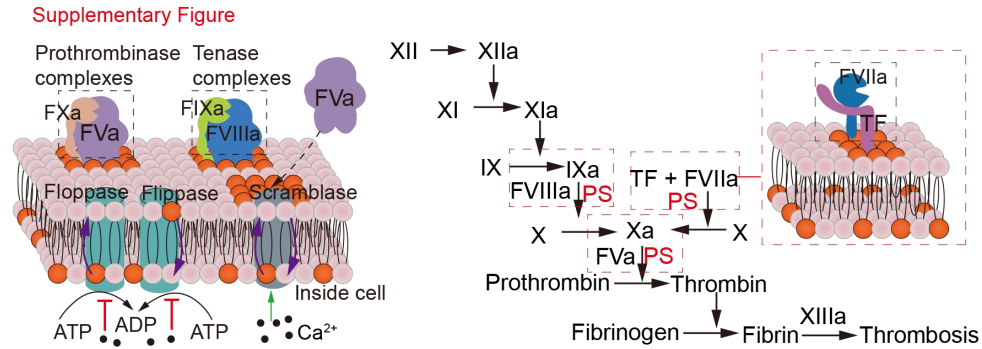

**Supplementary Figure Phosphatidylserine (PS) exposure and thrombosis.** PS is usually confined to the inner leaflet of the cell membrane. This asymmetry is maintained through ATP-dependent inward transport of PS by flippases and outward transport of non-PS by floppases. Upon stimulation, calcium transients will inhibit ATP-dependent transport and stimulate the nonselective lipid transporter scramblase (ATP-independent), resulting in PS exposure and microparticles release (left). PS exposure provides binding sites for FVa and Xa (or FVIIIa and IXa) to form prothrombinase (or tenase) complexes, promoting thrombin (or Xa) formation (right). Additionally, exposed PS also activates tissue factor on endothelial cells, triggering the extrinsic coagulation pathway (right).
